# Supplementary material
Source: publisher figshare collection journal article supplement (https://tandf.figshare.com/ndownloader/files/21397872)
Supplement: Supplementary file 1 [file 21397872]

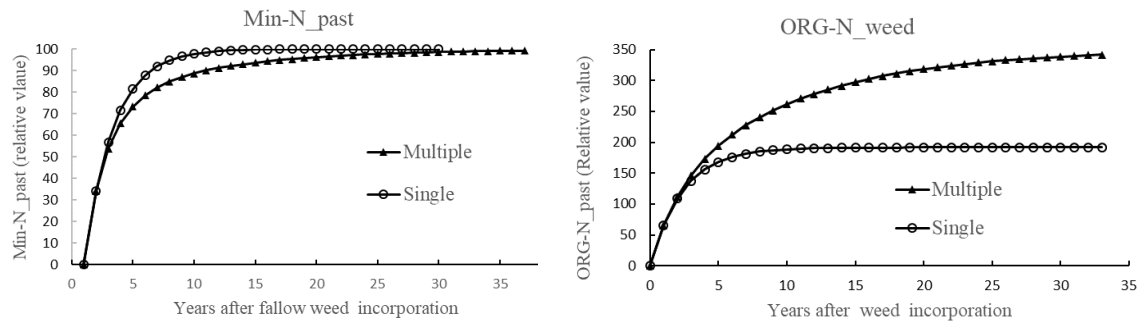

**Figure S1. Example of a simulated changes of Min-N<sub>past</sub> and ORG-N<sub>weed</sub> with incorporation years of weed which have a single decomposition rate constant ( $k$ ) and multiple decomposition rate constants ( $k_1, k_2, k_3$ ).**

Simulation conditions: Single decomposition rate constant, all organic matter has  $k$  of 0.42; Multiple decomposition rate constants, 25% of organic matter has  $k_1$  of 0.10, 50% has  $k_2$  of 0.42 and 25% has  $k_3$  of 0.90.
